# Supplementary material for: A unique octadecahedron SrTiO3 perovskite oxide with a nano step-shaped facet structure for enhanced photoredox and hydrogen evolution performance
Source: Royal Society of Chemistry journal article supplement (doi:10.1039/d3ta03239f), 2023-01-01
Supplement: d3ta03239f1.pdf [file d3ta03239f1.pdf]

## Supplementary Information

### **A Unique Octadecahedron SrTiO<sub>3</sub> perovskite oxide with nano step-shaped facet structure for enhanced photoredox and hydrogen evolution performance.**

Chuyu Wang <sup>a, b</sup>, Yan Li <sup>a</sup>, Xiaojiao Cai <sup>a</sup>, Dongping Duan <sup>\* a, b</sup>, Qibo Jia <sup>\* a</sup>

a. CAS Key Laboratory of Green Process and Engineering, National Engineering Research Center of Green Recycling for Strategic Metal Resources, Institute of Process Engineering, Chinese Academy of Sciences, Beijing 100190, China.

b. University of Chinese Academy of Sciences, Beijing 100049, China

#### **Corresponding Author**

Email: douglass@ipe.ac.cn; qibojia@126.com.

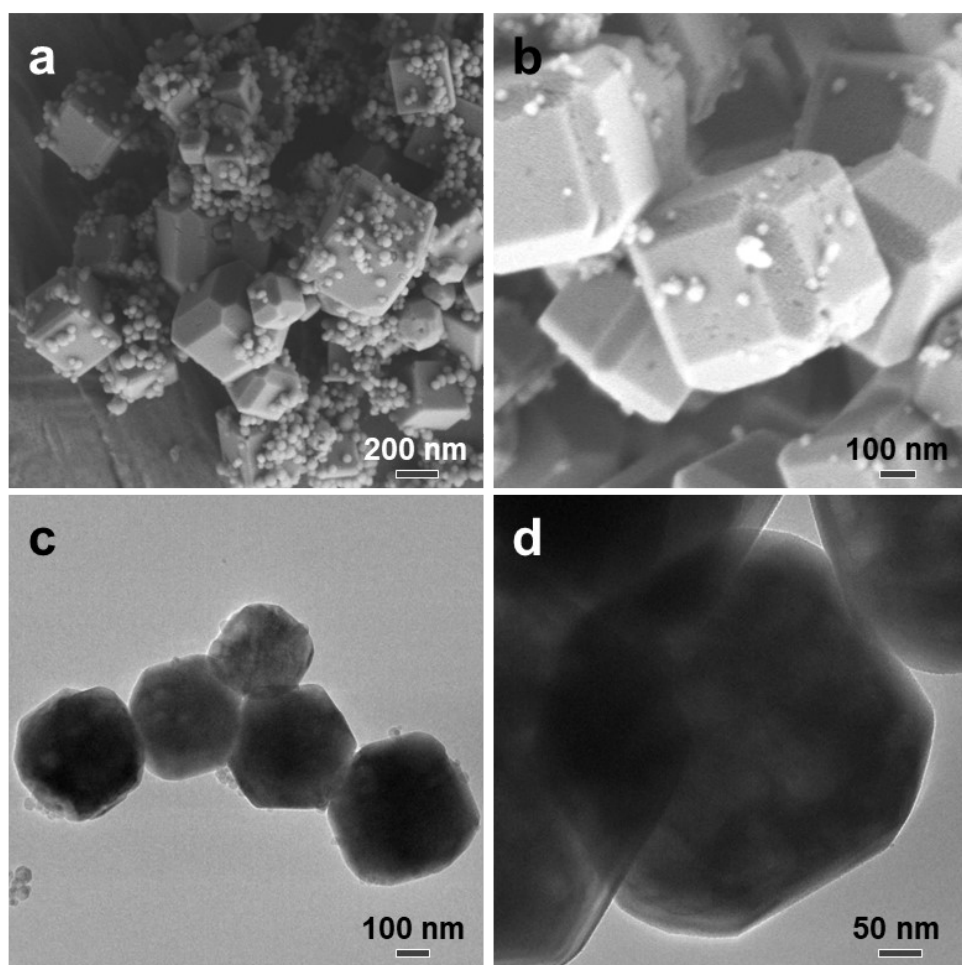

**Figure S1.** SEM graph (a, b) and TEM graph (c, d) of 18-STO-HM.

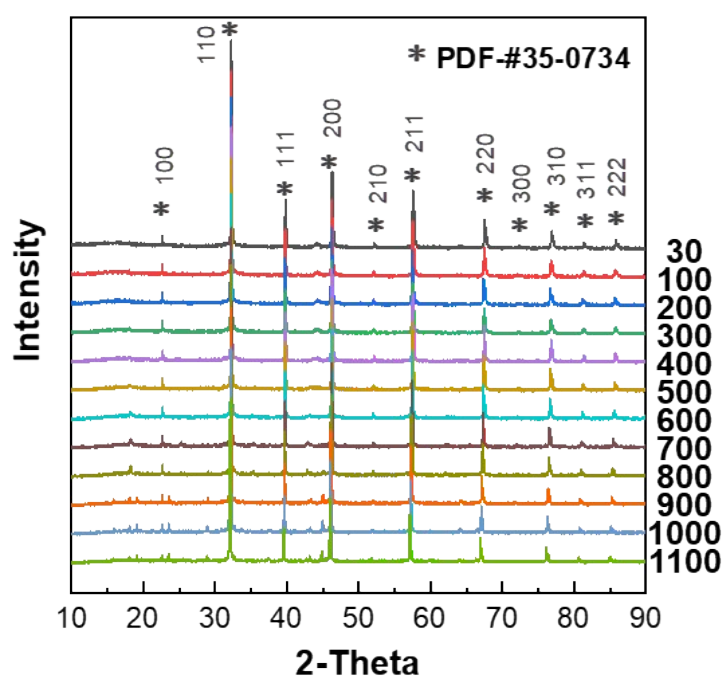

**Figure S2.** The two-dimensional diagram in-situ XRD pattern solid-state reaction of 18-STO-HM.

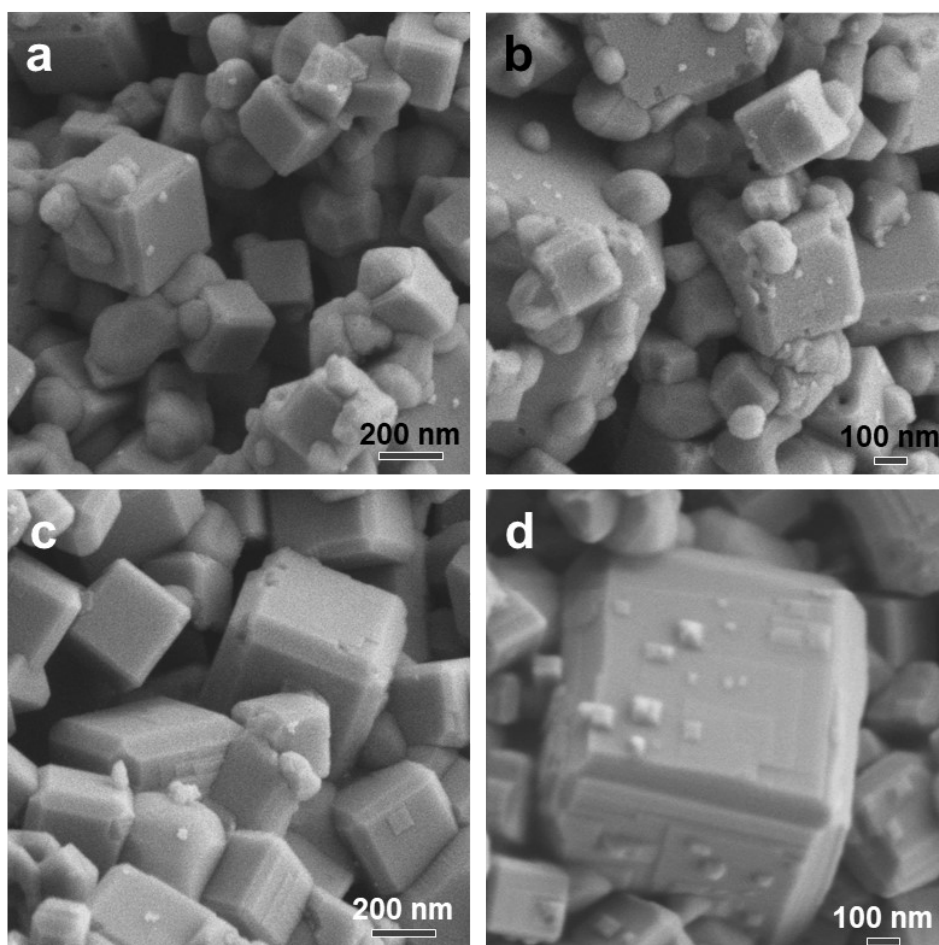

**Figure S3.** SEM graph of 18-STO-HM after solid-state reaction at 900 °C (a, b) and 1000 °C (c, d) for 1h.

**Table S1.** Surface compositions and chemical state of titanium and oxygen species over as-prepared catalysts.

| Catalyst            | $\text{Ti}^{4+}$ |              |       | $\text{Ti}^{3+}$ |              | $\text{O}_{\text{STO}}$ |              | $\text{O}_{\text{TiO}}$ |              | $\text{O}_{\text{vacancy}}$ |              |
|---------------------|------------------|--------------|-------|------------------|--------------|-------------------------|--------------|-------------------------|--------------|-----------------------------|--------------|
|                     | BE<br>(eV)       | Cont.<br>(%) |       | BE<br>(eV)       | Cont.<br>(%) | BE<br>(eV)              | Cont.<br>(%) | BE<br>(eV)              | Cont.<br>(%) | BE<br>(eV)                  | Cont.<br>(%) |
| <b>18-STO-HM</b>    | 458.22           | 463.81       | 85.53 | 457.71           | 14.47        | 529.34                  | 64.9         | 530.17                  | 16.9         | 531.41                      | 18.2         |
| <b>Step-STO-SSR</b> | 458.17           | 463.70       | 80.09 | 457.71           | 19.91        | 529.20                  | 65.8         | 530.12                  | 7.2          | 531.45                      | 27.0         |

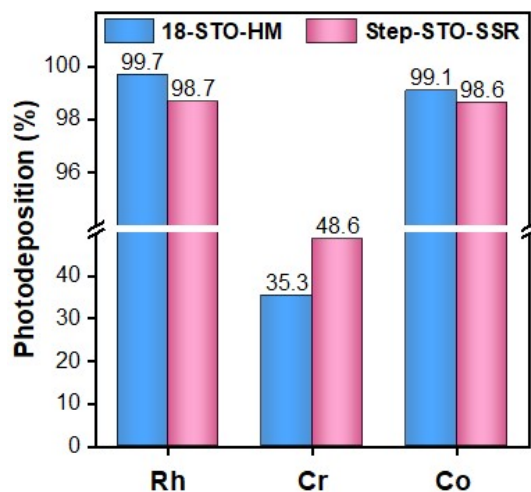

**Figure S4.** Photodeposition efficiency of STO loaded with 0.1 wt% Rh, 0.05 wt% Cr, and 0.05 wt% Co.

**Table S2.** The lifetime fitting values of time-resolved fluorescence curves.

| Catalyst     | $R(t) = B_1 e^{-t/\tau_1} + B_2 e^{-t/\tau_2}$ |              |                  |              |
|--------------|------------------------------------------------|--------------|------------------|--------------|
|              | $\tau_1$<br>(ns)                               | $B_1$<br>(%) | $\tau_2$<br>(ns) | $B_2$<br>(%) |
| 18-STO-HM    | 0.8403                                         | 74.20        | 4.2413           | 25.8         |
| Step-STO-SSR | 1.0534                                         | 68.89        | 9.6753           | 31.11        |

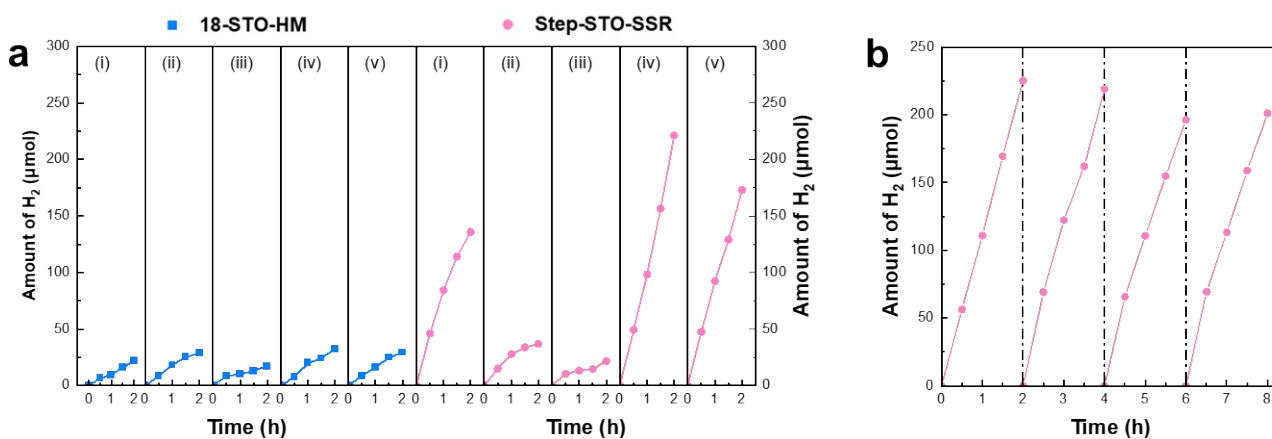

**Figure S5.** (a) Time course of H<sub>2</sub> evolution over 18-STO-HM and Step-STO-SSR loaded with Rh (0.1 wt%) (i), Cr (0.05 wt%) (ii), Co (0.05 wt%) (iii), Rh (0.1 wt%)/Cr (0.05 wt%) and, Rh (0.1 wt%)/Co (0.05 wt%) (v). (b) Stability test of Step-STO-SSR loaded with Rh (0.1 wt%)/Cr (0.05 wt%)/Co (0.05 wt%) during photocatalytic overall water splitting.
